# Supplementary material for: Intraspecific Variability in Trionymus aberrans Goux, 1938 (Hemiptera: Coccomorpha: Pseudococcidae) with Description of the Second-Instar Nymph
Source: MDPI journal article supplement (doi:10.3390/insects14120945), 2023-12-13
Supplement: s1 [file s1]

**Table S1.** List of examined microscope slides of adult females of *Trionymus aberrans* Goux, 1938.

| Coll. number                | Valid Taxon Full Name                | Gathering Agent Person Name | Identifier Person Name | Locality   | Coun t. code | Date       | N |
|-----------------------------|--------------------------------------|-----------------------------|------------------------|------------|--------------|------------|---|
| MNHN 806/a/2                | <i>Trionymus aberrans</i> Goux, 1938 | Goux                        | Goux                   | Marseille  | FR           | 1936-08-01 | 1 |
| MNHN 806/a/3                | <i>Trionymus aberrans</i> Goux, 1938 | Goux                        | Goux                   | Marseille  | FR           | 1936-08-01 | 1 |
| MNHN Goux coll.1189         | <i>Trionymus aberrans</i> Goux, 1938 | Goux                        | Goux                   | Rhône      | FR           | 1941-09-02 | 3 |
| DZUS                        | <i>Trionymus aberrans</i> Goux, 1938 | Ogaza, Koteja               | Koteja                 | Szczawnica | PL           | 1964-06-22 | 1 |
| DZUS                        | <i>Trionymus aberrans</i> Goux, 1938 | Ogaza                       | Ogaza                  | Tompa      | HU           | 1964-09-09 | 1 |
| DZUS 1439                   | <i>Trionymus aberrans</i> Goux, 1938 | Ogaza                       | Ogaza                  | Sutomore   | ME           | 1965-09-23 | 1 |
| DZUS 2262, 2263             | <i>Trionymus aberrans</i> Goux, 1938 | Koteja                      | Koteja                 | Kraków     | PL           | 1967-09-05 | 2 |
| DZUS 3214, 3216, 3217, 3218 | <i>Trionymus aberrans</i> Goux, 1938 | Koteja                      | Koteja                 | Mikoszewo  | PL           | 1969-08-04 | 4 |
| DZUS 3511, 3512, 3513       | <i>Trionymus aberrans</i> Goux, 1938 | Koteja                      | Koteja                 | Kryspinów  | PL           | 1970-07-27 | 3 |
| DZUS 26                     | <i>Trionymus aberrans</i> Goux, 1938 | Ogaza                       | Ogaza                  | Emlékerdő  | HU           | 1964-09-11 | 1 |

|          |                               |                        |                        |                  |    |            |   |
|----------|-------------------------------|------------------------|------------------------|------------------|----|------------|---|
| DZUS 27  | Trionymus aberrans Goux, 1938 | Ogaza                  | Ogaza                  | Tompa            | HU | 1964-09-09 | 1 |
| DZUS     | Trionymus aberrans Goux, 1938 | Ogaza                  | Ogaza                  | Sutomore         | ME | 1965-09-28 | 1 |
| DZUS 80  | Trionymus aberrans Goux, 1938 | Simon                  | Simon                  | Przerycie        | PL | 2005-07-25 | 1 |
| DZUS     | Trionymus aberrans Goux, 1938 | Simon                  | Simon                  | Brantółka        | PL | 2005-07-28 | 2 |
| DZUS     | Trionymus aberrans Goux, 1938 | Simon                  | Simon                  | Tworóg Mały      | PL | 2005-08-16 | 2 |
| DZUS     | Trionymus aberrans Goux, 1938 | Simon                  | Simon                  | Stanica          | PL | 2005-08-17 | 1 |
| DZUS 24  | Trionymus aberrans Goux, 1938 | Simon                  | Simon                  | Bargłówka        | PL | 2005-08-22 | 2 |
| DZUS 23  | Trionymus aberrans Goux, 1938 | Simon                  | Simon                  | Przerycie        | PL | 2005-08-29 | 1 |
| DZUS 130 | Trionymus aberrans Goux, 1938 | Simon                  | Simon                  | Ruda Kozielska   | PL | 2006-07-22 | 2 |
| DZUS     | Trionymus aberrans Goux, 1938 | Kalandyk-Kołodziejczyk | Kalandyk-Kołodziejczyk | Klucze           | PL | 2006-08-01 | 2 |
| DZUS     | Trionymus aberrans Goux, 1938 | Kalandyk-Kołodziejczyk | Kalandyk-Kołodziejczyk | Rogoźnik         | PL | 2006-08-12 | 1 |
| DZUS     | Trionymus aberrans Goux, 1938 | Kalandyk-Kołodziejczyk | Kalandyk-Kołodziejczyk | Wojkowice        | PL | 2006-08-12 | 1 |
| DZUS     | Trionymus aberrans Goux, 1938 | Kalandyk-Kołodziejczyk | Kalandyk-Kołodziejczyk | Nowa Wieś        | PL | 2006-08-15 | 2 |
| DZUS     | Trionymus aberrans Goux, 1938 | Kalandyk-Kołodziejczyk | Kalandyk-Kołodziejczyk | Góra Siewierska  | PL | 2006-08-15 | 3 |
| DZUS     | Trionymus aberrans Goux, 1938 | Kalandyk-Kołodziejczyk | Kalandyk-Kołodziejczyk | Bukowno          | PL | 2006-08-24 | 2 |
| DZUS     | Trionymus aberrans Goux, 1938 | Kalandyk-Kołodziejczyk | Kalandyk-Kołodziejczyk | Twardowice       | PL | 2006-09-19 | 1 |
| DZUS     | Trionymus aberrans Goux, 1938 | Kalandyk-Kołodziejczyk | Kalandyk-Kołodziejczyk | Toporowice       | PL | 2007-08-07 | 2 |
| DZUS     | Trionymus aberrans Goux, 1938 | Kalandyk-Kołodziejczyk | Kalandyk-Kołodziejczyk | Dąbrowa Górnicza | PL | 2008-07-05 | 1 |

|                      |                               |                        |                        |                  |    |            |    |
|----------------------|-------------------------------|------------------------|------------------------|------------------|----|------------|----|
| DZUS                 | Trionymus aberrans Goux, 1938 | Kalandyk-Kołodziejczyk | Kalandyk-Kołodziejczyk | Ruda Śląska      | PL | 2010-06-30 | 1  |
| DZUS                 | Trionymus aberrans Goux, 1938 | Kalandyk-Kołodziejczyk | Kalandyk-Kołodziejczyk | Katowice         | PL | 2010-08-20 | 1  |
| DZUS                 | Trionymus aberrans Goux, 1938 | Kalandyk-Kołodziejczyk | Kalandyk-Kołodziejczyk | Ruda Śląska      | PL | 2010-08-21 | 1  |
| DZUS                 | Trionymus aberrans Goux, 1938 | Kalandyk-Kołodziejczyk | Kalandyk-Kołodziejczyk | Dąbrowa Górnicza | PL | 2010-09-07 | 1  |
| DZUS                 | Trionymus aberrans Goux, 1938 | Kalandyk-Kołodziejczyk | Kalandyk-Kołodziejczyk | Sławków          | PL | 2010-09-14 | 1  |
| DZUS                 | Trionymus aberrans Goux, 1938 | Kalandyk-Kołodziejczyk | Kalandyk-Kołodziejczyk | Częstochowa      | PL | 2010-09-23 | 1  |
| DZUS                 | Trionymus aberrans Goux, 1938 | Kalandyk-Kołodziejczyk | Kalandyk-Kołodziejczyk | Twardowice       | PL | 2010-10-01 | 1  |
| DZUS                 | Trionymus aberrans Goux, 1938 | Kalandyk-Kołodziejczyk | Kalandyk-Kołodziejczyk | Dąbrowa Górnicza | PL | 2010-10-02 | 1  |
| DZUS                 | Trionymus aberrans Goux, 1938 | Kalandyk-Kołodziejczyk | Kalandyk-Kołodziejczyk | Katowice         | PL | 2010-11-18 | 1  |
| DZUS                 | Trionymus aberrans Goux, 1938 | Kalandyk-Kołodziejczyk | Kalandyk-Kołodziejczyk | Ruda Śląska      | PL | 2011-07-13 | 3  |
| DZUS                 | Trionymus aberrans Goux, 1938 | Kalandyk-Kołodziejczyk | Kalandyk-Kołodziejczyk | Katowice         | PL | 2011-09-23 | 1  |
| DZUS                 | Trionymus aberrans Goux, 1938 | Kalandyk-Kołodziejczyk | Kalandyk-Kołodziejczyk | Katowice         | PL | 2011-09-25 | 4  |
| DZUS                 | Trionymus aberrans Goux, 1938 | Kalandyk-Kołodziejczyk | Kalandyk-Kołodziejczyk | Ruda Śląska      | PL | 2011-09-25 | 30 |
| DZUS<br>329, 28, 321 | Trionymus aberrans Goux, 1938 | Kalandyk-Kołodziejczyk | Kalandyk-Kołodziejczyk |                  | AT | 2011-10-02 | 3  |
| DZUS                 | Trionymus aberrans Goux, 1938 | Kalandyk-Kołodziejczyk | Kalandyk-Kołodziejczyk | Dąbrowa Górnicza | PL | 2012-08-27 | 1  |
| DZUS                 | Trionymus aberrans Goux, 1938 | Kalandyk-Kołodziejczyk | Kalandyk-Kołodziejczyk | Katowice         | PL | 2012-09-25 | 1  |

|           |                               |                        |                        |                 |    |            |    |
|-----------|-------------------------------|------------------------|------------------------|-----------------|----|------------|----|
| CZPOL COL | Trionymus aberrans Goux, 1938 | Kalandyk-Kołodziejczyk | Kalandyk-Kołodziejczyk | Piekary Śląskie | PL | 2011-07-26 | 3  |
| CZPOL COL | Trionymus aberrans Goux, 1938 | Kalandyk-Kołodziejczyk | Kalandyk-Kołodziejczyk | Piekary Śląskie | PL | 2015-09-20 | 3  |
| CZPOL COL | Trionymus aberrans Goux, 1938 | Kalandyk-Kołodziejczyk | Kalandyk-Kołodziejczyk | Piekary Śląskie | PL | 2015-09-25 | 3  |
| CZPOL COL | Trionymus aberrans Goux, 1938 | Kalandyk-Kołodziejczyk | Kalandyk-Kołodziejczyk | Piekary Śląskie | PL | 2016-09-27 | 4  |
| CZPOL COL | Trionymus aberrans Goux, 1938 | Kalandyk-Kołodziejczyk | Kalandyk-Kołodziejczyk | Piekary Śląskie | PL | 2017-09-02 | 7  |
| CZPOL COL | Trionymus aberrans Goux, 1938 | Kalandyk-Kołodziejczyk | Kalandyk-Kołodziejczyk | Piekary Śląskie | PL | 2020-09-12 | 10 |
| CZPOL COL | Trionymus aberrans Goux, 1938 | Kalandyk-Kołodziejczyk | Kalandyk-Kołodziejczyk | Krajno Pierwsze | PL | 2018-08-30 | 4  |
| CZPOL COL | Trionymus aberrans Goux, 1938 | Kalandyk-Kołodziejczyk | Kalandyk-Kołodziejczyk | Krajno Pierwsze | PL | 2018-08-31 | 3  |
| CZPOL COL | Trionymus aberrans Goux, 1938 | Kalandyk-Kołodziejczyk | Kalandyk-Kołodziejczyk | Krajno Pierwsze | PL | 2018-09-01 | 3  |
| CZPOL COL | Trionymus aberrans Goux, 1938 | Kalandyk-Kołodziejczyk | Kalandyk-Kołodziejczyk | Krajno Pierwsze | PL | 2019-09-25 | 5  |
| CZPOL COL | Trionymus aberrans Goux, 1938 | Kalandyk-Kołodziejczyk | Kalandyk-Kołodziejczyk | Bolesław        | PL | 2012-08-16 | 5  |
| CZPOL COL | Trionymus aberrans Goux, 1938 | Kalandyk-Kołodziejczyk | Kalandyk-Kołodziejczyk | Bolesław        | PL | 2012-09-12 | 5  |
| CZPOL COL | Trionymus aberrans Goux, 1938 | Kalandyk-Kołodziejczyk | Kalandyk-Kołodziejczyk | Ruda Śląska     | PL | 2011-08-01 | 6  |
| CZPOL COL | Trionymus aberrans Goux, 1938 | Kalandyk-Kołodziejczyk | Kalandyk-Kołodziejczyk | Ostrava         | CZ | 2018-08-18 | 9  |
|           | Trionymus aberrans Goux, 1938 | Kalandyk-Kołodziejczyk | Kalandyk-Kołodziejczyk | Vienna          | AT | 2015-10    | 5  |
|           | Trionymus aberrans Goux, 1938 | Kalandyk-Kołodziejczyk | Kalandyk-Kołodziejczyk | Vienna          | AT | 2017-06-20 | 5  |

|  |                               |                        |                        |                 |    |            |    |
|--|-------------------------------|------------------------|------------------------|-----------------|----|------------|----|
|  | Trionymus aberrans Goux, 1938 | Kalandyk-Kołodziejczyk | Kalandyk-Kołodziejczyk | Piekary Śląskie | PL | 2018-07-24 | 6  |
|  | Trionymus aberrans Goux, 1938 | Kalandyk-Kołodziejczyk | Kalandyk-Kołodziejczyk | Piekary Śląskie | PL | 2019-07-22 | 3  |
|  | Trionymus aberrans Goux, 1938 | Kalandyk-Kołodziejczyk | Kalandyk-Kołodziejczyk | Piekary Śląskie | PL | 2021-08-22 | 4  |
|  | Trionymus aberrans Goux, 1938 | Kalandyk-Kołodziejczyk | Kalandyk-Kołodziejczyk | Bolesław        | PL | 2017-07-20 | 2  |
|  | Trionymus aberrans Goux, 1938 | Kalandyk-Kołodziejczyk | Kalandyk-Kołodziejczyk | Bolesław        | PL | 2018-08-21 | 2  |
|  | Trionymus aberrans Goux, 1938 | Kalandyk-Kołodziejczyk | Kalandyk-Kołodziejczyk | Bolesław        | PL | 2019-07-10 | 2  |
|  | Trionymus aberrans Goux, 1938 | Kalandyk-Kołodziejczyk | Kalandyk-Kołodziejczyk | Bolesław        | PL | 2021-05-09 | 8  |
|  | Trionymus aberrans Goux, 1938 | Kalandyk-Kołodziejczyk | Kalandyk-Kołodziejczyk | Ruda Śląska     | PL | 2017-07-25 | 10 |
|  | Trionymus aberrans Goux, 1938 | Kalandyk-Kołodziejczyk | Kalandyk-Kołodziejczyk | Ruda Śląska     | PL | 2018-09-04 | 2  |
|  | Trionymus aberrans Goux, 1938 | Kalandyk-Kołodziejczyk | Kalandyk-Kołodziejczyk | Ruda Śląska     | PL | 2020-08-05 | 1  |
|  | Trionymus aberrans Goux, 1938 | Kalandyk-Kołodziejczyk | Kalandyk-Kołodziejczyk | Ruda Śląska     | PL | 2020-10-05 | 10 |

coll.–collection; count. code–country code; CZPOL COL–Scale insects of Poland collection (In Polish: Czerwce Polski); DZUS–Department of Zoology, University of Silesia (currently Zoology Research Group); MNHN–Muséum national d'Histoire naturelle, Paris; N–number of microscope slides

country codes: AT–Austria, CZ–the Czech Republic, FR–France, HU–Hungary, ME–Montenegro, PL–Poland, RU–Russia

**Table S2.** Specimens of *Trionymus aberrans* Goux, 1938 analyzed using the scanning electron microscope (SEM).

| Valid Taxon Full Name         | Gathering Agent Person Name | Identifier Person Name | Locality        | Count. code | Date       |
|-------------------------------|-----------------------------|------------------------|-----------------|-------------|------------|
| Trionymus aberrans Goux, 1938 | Kalandyk-Kołodziejczyk      | Kalandyk-Kołodziejczyk | Bolesław        | PL          | 2012-08-16 |
| Trionymus aberrans Goux, 1938 | Kalandyk-Kołodziejczyk      | Kalandyk-Kołodziejczyk | Krajno Pierwsze | PL          | 2018-09-01 |
| Trionymus aberrans Goux, 1938 | Kalandyk-Kołodziejczyk      | Kalandyk-Kołodziejczyk | Ostrava         | CZ          | 2018-08-18 |
| Trionymus aberrans Goux, 1938 | Kalandyk-Kołodziejczyk      | Kalandyk-Kołodziejczyk | Piekary Śląskie | PL          | 2017-09-02 |
| Trionymus aberrans Goux, 1938 | Kalandyk-Kołodziejczyk      | Kalandyk-Kołodziejczyk | Piekary Śląskie | PL          | 2020-08-15 |
| Trionymus aberrans Goux, 1938 | Kalandyk-Kołodziejczyk      | Kalandyk-Kołodziejczyk | Piekary Śląskie | PL          | 2020-09-12 |
| Trionymus aberrans Goux, 1938 | Kalandyk-Kołodziejczyk      | Kalandyk-Kołodziejczyk | Ruda Śląska     | PL          | 2012-08-16 |

code–country codes: CZ–the Czech Republic, PL–Poland
